# Supplementary material for: Potential Targets for Evaluation of Sugarcane Yellow Leaf Virus Resistance in Sugarcane Cultivars: In silico Sugarcane miRNA and Target Network Prediction
Source: Preprints.org preprint supplement (doi:10.20944/preprints202109.0240.v1), 2021-09-14
Supplement: Supplementary file 1 [file supplementary]

Table.S3: Predicted characterized features of secondary structures of precursor miRNAs.

| Sugarcane miRNA   | Accession ID | miRNA Sequence        | Length miRNA | Length precursor | MFE <sup>1</sup> (Kcal/mol) | AMFE <sup>2</sup> | MFEI <sup>3</sup> | (G+C)%  |
|-------------------|--------------|-----------------------|--------------|------------------|-----------------------------|-------------------|-------------------|---------|
| sof-miR159e       | MI0001759    | UUUGGAUUGAAAGGAGCUCUU | 21           | 264              | -107.50                     | -40.71            | -1.06             | 38.09   |
| sof-miR167a       | MI0001761    | UGAAGCUGCCAGCAUGAUCUG | 21           | 188              | -82.70                      | -43.98            | -0.83             | 52.38   |
| sof-miR167b       | MI0001762    | UGAAGCUGCCAGCAUGAUCUG | 21           | 188              | -86.00                      | -45.74            | -0.87             | 52.38   |
| sof-miR168b       | MI0001764    | UCGCUUGGGCAGAUCGGGAC  | 20           | 103              | -56.10                      | -54.46            | -0.83             | 65.00   |
| ssp-miR169        | MI0018180    | UAGCCAAGGAUGACUUGCCGG | 21           | 146              | -73.60                      | -50.41            | -0.88             | 57.14   |
| <b>ssp-miR528</b> | MI0018188    | UGGAAGGGGCAUGCAGAGGAG | 21           | <b>92</b>        | <b>-48.50</b>               | -52.71            | <b>-0.85</b>      | 61.9047 |
| ssp-miR444b       | MI0018186    | UGCAGUUGUUGCCUCAAGCUU | 21           | 106              | -63.70                      | -60.09            | -1.262            | 47.6190 |

<sup>1</sup>MFE represents minimum free energy. <sup>2</sup>AMFE is an adjusted minimum free energy calculated by MFE/length of precursor\*100. MFEI defines as minimum free energy index which was calculated by AMFE/ (G+C) %.
