# Supplementary material for: Potential Targets for Evaluation of Sugarcane Yellow Leaf Virus Resistance in Sugarcane Cultivars: In silico Sugarcane miRNA and Target Network Prediction
Source: Preprints.org preprint supplement (doi:10.20944/preprints202109.0240.v1), 2021-09-14
Supplement: Supplementary file 2 [file supplementary]

```
=====
miranda v3.3a      microRNA Target Scanning Algorithm
=====
(c) 2003 Memorial Sloan-Kettering Cancer Center, New York
```

Authors: Anton Enright, Bino John, Chris Sander and Debora Marks  
(mirnatargets (at) cbio.mskcc.org - reaches all authors)

Software written by: Anton Enright  
Distributed for anyone to use under the GNU Public License (GPL),  
See the files 'COPYING' and 'LICENSE' for details

If you use this software please cite:  
Enright AJ, John B, Gaul U, Tuschl T, Sander C and Marks DS;  
(2003) Genome Biology; 5(1):R1.

miranda comes with ABSOLUTELY NO WARRANTY;  
This is free software, and you are welcome to redistribute it  
under certain conditions; type `miranda --license' for details.

Current Settings:

```
=====
Query Filename:    ./seq/mirna/sof_mirna.fasta
Reference Filename: ./seq/gene/sof/HQ342888.fasta
Gap Open Penalty:-9.000000
Gap Extend Penalty: -4.000000
Score Threshold: 130.000000
Energy Threshold:-15.000000 kcal/mol
Scaling Parameter: 4.000000
=====
Read Sequence:sof-miR156 (20 nt)
Read Sequence:HQ342888.1 Sugarcane yellow leaf virus isolate CHN-HN1,
complete genome
(5837 nt)
=====
Performing Scan: sof-miR156 vs HQ342888.1
=====
Score for this Scan:
No Hits Found above Threshold
Complete
```

```
Read Sequence:sof-miR159a (21 nt)
Read Sequence:HQ342888.1 Sugarcane yellow leaf virus isolate CHN-HN1,
complete genome
(5837 nt)
=====
Performing Scan: sof-miR159a vs HQ342888.1
=====
Score for this Scan:
No Hits Found above Threshold
Complete
```

```
Read Sequence:sof-miR159b (21 nt)
Read Sequence:HQ342888.1 Sugarcane yellow leaf virus isolate CHN-HN1,
complete genome
(5837 nt)
```

=====

Performing Scan: sof-miR159b vs HQ342888.1

=====

Score for this Scan:  
No Hits Found above Threshold  
Complete

Read Sequence:sof-miR159c (21 nt)  
Read Sequence:HQ342888.1 Sugarcane yellow leaf virus isolate CHN-HN1,  
complete genome  
(5837 nt)

=====

Performing Scan: sof-miR159c vs HQ342888.1

=====

Score for this Scan:  
No Hits Found above Threshold  
Complete

Read Sequence:sof-miR159d (21 nt)  
Read Sequence:HQ342888.1 Sugarcane yellow leaf virus isolate CHN-HN1,  
complete genome  
(5837 nt)

=====

Performing Scan: sof-miR159d vs HQ342888.1

=====

Score for this Scan:  
No Hits Found above Threshold  
Complete

Read Sequence:sof-miR159e (21 nt)  
Read Sequence:HQ342888.1 Sugarcane yellow leaf virus isolate CHN-HN1,  
complete genome  
(5837 nt)

=====

Performing Scan: sof-miR159e vs HQ342888.1

=====

Forward: Score: 130.000000 Q:2 to 20 R:4545 to 4569 Align Len (22)  
(63.64%) (77.27%)

Query: 3' uuCUCGAGGAAA---GUUAGGUUu 5'  
|:|:|:| | | | | | | | |  
Ref: 5' gcGGGTTTCTTTGTGACAATGCAAA 3'

Energy: -16.639999 kCal/Mol

Scores for this hit:

|              |            |        |        |   |    |      |      |    |
|--------------|------------|--------|--------|---|----|------|------|----|
| >sof-miR159e | HQ342888.1 | 130.00 | -16.64 | 2 | 20 | 4545 | 4569 | 22 |
|              | 63.64%     | 77.27% |        |   |    |      |      |    |

Score for this Scan:

Seq1,Seq2,Tot Score,Tot Energy,Max Score,Max  
Energy,Strand,Len1,Len2,Positions

|               |            |        |        |        |        |
|---------------|------------|--------|--------|--------|--------|
| >>sof-miR159e | HQ342888.1 | 130.00 | -16.64 | 130.00 | -16.64 |
| 6             | 21         | 5837   | 4545   |        |        |

Complete

Read Sequence:sof-miR167a (21 nt)

Read Sequence:HQ342888.1 Sugarcane yellow leaf virus isolate CHN-HN1,  
complete genome  
(5837 nt)

Performing Scan: sof-miR167a vs HQ342888.1

Forward: Score: 149.000000 Q:2 to 20 R:1646 to 1665 Align Len (18)  
(72.22%) (72.22%)

Query: 3' guCUAGUACGACCGUCGAAGu 5'  
          || || || || || || ||  
Ref: 5' aaGAGCAGACT-CCAGCTTCg 3'

Energy: -16.510000 kCal/Mol

Scores for this hit:

|              |            |        |        |   |    |      |      |    |
|--------------|------------|--------|--------|---|----|------|------|----|
| >sof-miR167a | HQ342888.1 | 149.00 | -16.51 | 2 | 20 | 1646 | 1665 | 18 |
|              | 72.22%     | 72.22% |        |   |    |      |      |    |

Forward: Score: 133.000000 Q:2 to 20 R:2279 to 2298 Align Len (18)  
(77.78%) (77.78%)

Query: 3' guCUAGUACGACCGUCGAAGu 5'  
          | || | || || || || ||  
Ref: 5' caGCTCCT-CTGGCAGCCTCa 3'

Energy: -21.719999 kCal/Mol

Scores for this hit:

|              |            |        |        |   |    |      |      |    |
|--------------|------------|--------|--------|---|----|------|------|----|
| >sof-miR167a | HQ342888.1 | 133.00 | -21.72 | 2 | 20 | 2279 | 2298 | 18 |
|              | 77.78%     | 77.78% |        |   |    |      |      |    |

Score for this Scan:

Seq1,Seq2,Tot Score,Tot Energy,Max Score,Max

Energy,Strand,Len1,Len2,Positions

|               |            |        |        |        |        |
|---------------|------------|--------|--------|--------|--------|
| >>sof-miR167a | HQ342888.1 | 282.00 | -38.23 | 149.00 | -21.72 |
| 7             | 21         | 5837   | 1646   | 2279   |        |

Complete

Read Sequence:sof-miR167b (21 nt)

Read Sequence:HQ342888.1 Sugarcane yellow leaf virus isolate CHN-HN1,  
complete genome  
(5837 nt)

Performing Scan: sof-miR167b vs HQ342888.1

Forward: Score: 149.000000 Q:2 to 20 R:1646 to 1665 Align Len (18)  
(72.22%) (72.22%)

Query: 3' guCUAGUACGACCGUCGAAGu 5'  
          || || || || || || ||  
Ref: 5' aaGAGCAGACT-CCAGCTTCg 3'

Energy: -16.510000 kCal/Mol

Scores for this hit:

```
>sof-miR167b      HQ342888.1  149.00      -16.51      2 20  1646 1665   18
      72.22%      72.22%
```

Forward: Score: 133.000000 Q:2 to 20 R:2279 to 2298 Align Len (18)  
(77.78%) (77.78%)

Query: 3' guCUAGUACGACCGUCGAAGu 5'

| || | ||||| ||

Ref: 5' caGCTCCT-CTGGCAGCCTCa 3'

Energy: -21.719999 kCal/Mol

Scores for this hit:

```
>sof-miR167b      HQ342888.1  133.00      -21.72      2 20  2279 2298   18
      77.78%      77.78%
```

Score for this Scan:

Seq1,Seq2,Tot Score,Tot Energy,Max Score,Max  
Energy,Strand,Len1,Len2,Positions

```
>>sof-miR167b      HQ342888.1  282.00      -38.23      149.00      -21.72
      8      21      5837      1646 2279
```

Complete

Read Sequence:sof-miR168a (21 nt)

Read Sequence:HQ342888.1 Sugarcane yellow leaf virus isolate CHN-HN1,  
complete genome  
(5837 nt)

Performing Scan: sof-miR168a vs HQ342888.1

Forward: Score: 151.000000 Q:2 to 17 R:374 to 395 Align Len (16)  
(75.00%) (81.25%)

Query: 3' cagggCUA-GACGUGGUUCGcu 5'

||| | |: |||||

Ref: 5' taaggGATGCCGTTCCAAGCGg 3'

Energy: -19.100000 kCal/Mol

Scores for this hit:

```
>sof-miR168a      HQ342888.1  151.00      -19.10      2 17  374 395   16
      75.00%      81.25%
```

Forward: Score: 146.000000 Q:2 to 16 R:2140 to 2163 Align Len (17)  
(70.59%) (76.47%)

Query: 3' cagggcUAGAC---GUGGUUCGcu 5'

:||| | |||||

Ref: 5' agacaaGTCTGAGACTCCAAGCGg 3'

Energy: -22.100000 kCal/Mol

Scores for this hit:

>sof-miR168a      HQ342888.1 146.00      -22.10      2 16 2140 2163 17  
70.59%      76.47%

Forward: Score: 134.000000 Q:3 to 20 R:2115 to 2136 Align Len (18)  
(66.67%) (77.78%)

Query:      3' caGGGCUAGACGU-GGUUCGcu 5'  
             |:|    ||    |:    |||||  
Ref:      5' ccCTCCTTCGGCGCCCAAGCcg 3'

Energy: -18.000000 kCal/Mol

Scores for this hit:

>sof-miR168a      HQ342888.1 134.00      -18.00      3 20 2115 2136 18  
66.67%      77.78%

Score for this Scan:

Seq1,Seq2,Tot Score,Tot Energy,Max Score,Max  
Energy,Strand,Len1,Len2,Positions

>>sof-miR168a      HQ342888.1 431.00      -59.20      151.00      -22.10  
9      21      5837      374 2140 2115

Complete

Read Sequence:sof-miR168b (20 nt)

Read Sequence:HQ342888.1 Sugarcane yellow leaf virus isolate CHN-HN1,  
complete genome  
(5837 nt)

=====

Performing Scan: sof-miR168b vs HQ342888.1

=====

Forward: Score: 145.000000 Q:2 to 16 R:374 to 395 Align Len (16)  
(75.00%) (81.25%)

Query:      3' cagggCUA-GAC-GGGUUCGcu 5'  
             |||    |    :|||  
Ref:      5' taaggGATGCCGTTC AAGCGg 3'

Energy: -20.719999 kCal/Mol

Scores for this hit:

>sof-miR168b      HQ342888.1 145.00      -20.72      2 16 374 395 16  
75.00%      81.25%

Forward: Score: 142.000000 Q:2 to 19 R:2145 to 2163 Align Len (18)  
(66.67%) (77.78%)

Query:      3' caGGGCU-AGACGGGUUCGcu 5'  
             :|:|    ||    |||||  
Ref:      5' agTCTGAGACT--CCAAGCGg 3'

Energy: -22.129999 kCal/Mol

Scores for this hit:

>sof-miR168b      HQ342888.1 142.00      -22.13      2 19 2145 2163 18  
66.67%      77.78%

Forward: Score: 130.000000 Q:3 to 11 R:2117 to 2136 Align Len (8)  
(100.00%) (100.00%)

Query: 3' cagggcuagaCGGGUUCGcu 5'

Ref: 5' ctccttcggcGCCCAAGCcg 3'

Energy: -21.360001 kCal/Mol

Scores for this hit:

|              |            |         |        |   |    |      |      |   |
|--------------|------------|---------|--------|---|----|------|------|---|
| >sof-miR168b | HQ342888.1 | 130.00  | -21.36 | 3 | 11 | 2117 | 2136 | 8 |
|              | 100.00%    | 100.00% |        |   |    |      |      |   |

Forward: Score: 130.000000 Q:3 to 11 R:5791 to 5810 Align Len (8)  
(100.00%) (100.00%)

Query: 3' cagggcuagaCGGGUUCGcu 5'

Ref: 5' atcctttggaaGCCCAAGCta 3'

Energy: -16.330000 kCal/Mol

Scores for this hit:

|              |            |         |        |   |    |      |      |   |
|--------------|------------|---------|--------|---|----|------|------|---|
| >sof-miR168b | HQ342888.1 | 130.00  | -16.33 | 3 | 11 | 5791 | 5810 | 8 |
|              | 100.00%    | 100.00% |        |   |    |      |      |   |

Score for this Scan:

Seq1,Seq2,Tot Score,Tot Energy,Max Score,Max

Energy,Strand,Len1,Len2,Positions

|               |            |        |        |        |           |
|---------------|------------|--------|--------|--------|-----------|
| >>sof-miR168b | HQ342888.1 | 547.00 | -80.54 | 145.00 | -22.13    |
| 10            | 20         | 5837   | 374    | 2145   | 2117 5791 |

Complete

Read Sequence:sof-miR396 (21 nt)

Read Sequence:HQ342888.1 Sugarcane yellow leaf virus isolate CHN-HN1,  
complete genome  
(5837 nt)

Performing Scan: sof-miR396 vs HQ342888.1

Forward: Score: 134.000000 Q:2 to 16 R:2661 to 2683 Align Len (16)  
(68.75%) (81.25%)

Query: 3' gucaagUUCUUUC--GACACCUu 5'

Ref: 5' aaaagaGAGATAGCTTTGTGGAg 3'

Energy: -17.260000 kCal/Mol

Scores for this hit:

|             |            |        |        |   |    |      |      |    |
|-------------|------------|--------|--------|---|----|------|------|----|
| >sof-miR396 | HQ342888.1 | 134.00 | -17.26 | 2 | 16 | 2661 | 2683 | 16 |
|             | 68.75%     | 81.25% |        |   |    |      |      |    |

Forward: Score: 130.000000 Q:2 to 20 R:3732 to 3755 Align Len (21)  
(71.43%) (80.95%)

Query: 3' guCAAGUUCUUU--CGACAC-CUu 5'  
||| :||:| | ||||| |  
Ref: 5' gtGTTGGAGGAAACGCTGTGCGAg 3'

Energy: -19.180000 kCal/Mol

Scores for this hit:

|                        |        |        |   |    |      |      |    |
|------------------------|--------|--------|---|----|------|------|----|
| >sof-miR396 HQ342888.1 | 130.00 | -19.18 | 2 | 20 | 3732 | 3755 | 21 |
|                        | 71.43% | 80.95% |   |    |      |      |    |

Forward: Score: 130.000000 Q:3 to 17 R:5115 to 5137 Align Len (16)  
(75.00%) (81.25%)

Query: 3' gucaaGUUCU-U-UCGACACCuu 5'  
|:| | | | | | | | | |  
Ref: 5' accagCGAGATATACCTGTGGtg 3'

Energy: -17.270000 kCal/Mol

Scores for this hit:

|                        |        |        |   |    |      |      |    |
|------------------------|--------|--------|---|----|------|------|----|
| >sof-miR396 HQ342888.1 | 130.00 | -17.27 | 3 | 17 | 5115 | 5137 | 16 |
|                        | 75.00% | 81.25% |   |    |      |      |    |

Score for this Scan:

Seq1,Seq2,Tot Score,Tot Energy,Max Score,Max  
Energy,Strand,Len1,Len2,Positions

|              |            |        |        |        |        |
|--------------|------------|--------|--------|--------|--------|
| >>sof-miR396 | HQ342888.1 | 394.00 | -53.71 | 134.00 | -19.18 |
| 11           | 21         | 5837   | 2661   | 3732   | 5115   |

Complete

Read Sequence:sof-miR408a (21 nt)

Read Sequence:HQ342888.1 Sugarcane yellow leaf virus isolate CHN-HN1,  
complete genome  
(5837 nt)

=====

Performing Scan: sof-miR408a vs HQ342888.1

=====

Score for this Scan:

No Hits Found above Threshold

Complete

Read Sequence:sof-miR408b (21 nt)

Read Sequence:HQ342888.1 Sugarcane yellow leaf virus isolate CHN-HN1,  
complete genome  
(5837 nt)

=====

Performing Scan: sof-miR408b vs HQ342888.1

=====

Score for this Scan:

No Hits Found above Threshold

Complete

Read Sequence:sof-miR408c (21 nt)

Read Sequence:HQ342888.1 Sugarcane yellow leaf virus isolate CHN-HN1,  
complete genome  
(5837 nt)

Performing Scan: sof-miR408c vs HQ342888.1

Score for this Scan:  
No Hits Found above Threshold  
Complete

Read Sequence:sof-miR408d (21 nt)

Read Sequence:HQ342888.1 Sugarcane yellow leaf virus isolate CHN-HN1,  
complete genome  
(5837 nt)

Performing Scan: sof-miR408d vs HQ342888.1

Score for this Scan:  
No Hits Found above Threshold  
Complete

Read Sequence:sof-miR408e (21 nt)

Read Sequence:HQ342888.1 Sugarcane yellow leaf virus isolate CHN-HN1,  
complete genome  
(5837 nt)

Performing Scan: sof-miR408e vs HQ342888.1

Forward: Score: 136.000000 Q:3 to 20 R:888 to 906 Align Len (17)  
(76.47%) (76.47%)

Query: 3' cgGUCCCUUCUCAGUCACGuc 5'

|||| | | |||||

Ref: 5' acCAGG--ACACTCAGTGctt 3'

Energy: -20.040001 kCal/Mol

Scores for this hit:

|              |            |        |        |   |    |     |     |    |
|--------------|------------|--------|--------|---|----|-----|-----|----|
| >sof-miR408e | HQ342888.1 | 136.00 | -20.04 | 3 | 20 | 888 | 906 | 17 |
|              | 76.47%     | 76.47% |        |   |    |     |     |    |

Score for this Scan:

Seq1,Seq2,Tot Score,Tot Energy,Max Score,Max

Energy,Strand,Len1,Len2,Positions

|               |            |        |        |        |        |
|---------------|------------|--------|--------|--------|--------|
| >>sof-miR408e | HQ342888.1 | 136.00 | -20.04 | 136.00 | -20.04 |
|               | 16         | 21     | 5837   | 888    |        |

Complete

Read Sequence:ssp-miR166 (21 nt)

Read Sequence:HQ342888.1 Sugarcane yellow leaf virus isolate CHN-HN1,  
complete genome  
(5837 nt)

Performing Scan: ssp-miR166 vs HQ342888.1



Forward: Score: 147.000000 Q:2 to 18 R:3672 to 3691 Align Len (16)  
(68.75%) (81.25%)

Query: 3' ccccUUACUUCGGACCAGGCu 5'

|:| | : | | | | |

Ref: 5' ggccAGTG-GTCGTGGTCCGg 3'

Energy: -22.709999 kCal/Mol

Scores for this hit:

|                        |        |        |   |    |      |      |    |
|------------------------|--------|--------|---|----|------|------|----|
| >ssp-miR166 HQ342888.1 | 147.00 | -22.71 | 2 | 18 | 3672 | 3691 | 16 |
|                        | 68.75% | 81.25% |   |    |      |      |    |

Forward: Score: 146.000000 Q:2 to 11 R:2288 to 2308 Align Len (9)  
(88.89%) (100.00%)

Query: 3' ccccuuacuucGGACCAGGCu 5'

:| | | | | | |

Ref: 5' tggcagcctcaTCTGGTCCGa 3'

Energy: -21.420000 kCal/Mol

Scores for this hit:

|                        |        |         |   |    |      |      |   |
|------------------------|--------|---------|---|----|------|------|---|
| >ssp-miR166 HQ342888.1 | 146.00 | -21.42  | 2 | 11 | 2288 | 2308 | 9 |
|                        | 88.89% | 100.00% |   |    |      |      |   |

Forward: Score: 130.000000 Q:3 to 20 R:834 to 855 Align Len (18)  
(66.67%) (72.22%)

Query: 3' ccCCUUACU-UCGGACCAGGcu 5'

||:| | | | | | |

Ref: 5' agGGGACGAGAAAATGGTCCaa 3'

Energy: -21.190001 kCal/Mol

Scores for this hit:

|                        |        |        |   |    |     |     |    |
|------------------------|--------|--------|---|----|-----|-----|----|
| >ssp-miR166 HQ342888.1 | 130.00 | -21.19 | 3 | 20 | 834 | 855 | 18 |
|                        | 66.67% | 72.22% |   |    |     |     |    |

Score for this Scan:

Seq1,Seq2,Tot Score,Tot Energy,Max Score,Max

Energy,Strand,Len1,Len2,Positions

|              |            |        |        |        |        |
|--------------|------------|--------|--------|--------|--------|
| >>ssp-miR166 | HQ342888.1 | 423.00 | -65.32 | 147.00 | -22.71 |
| 17           | 21         | 5837   | 3672   | 2288   | 834    |

Complete

Read Sequence:ssp-miR169 (21 nt)

Read Sequence:HQ342888.1 Sugarcane yellow leaf virus isolate CHN-HN1,  
complete genome  
(5837 nt)

Performing Scan: ssp-miR169 vs HQ342888.1

Forward: Score: 144.000000 Q:2 to 17 R:2777 to 2797 Align Len (15)  
(86.67%) (93.33%)

Query: 3' ggccgUUCAGUAGGAACCGAu 5'

|||||||:| |||||  
Ref: 5' agcagAAGTCATTCATGGCTg 3'

Energy: -23.040001 kCal/Mol

Scores for this hit:

|                        |        |        |      |           |    |
|------------------------|--------|--------|------|-----------|----|
| >ssp-miR169 HQ342888.1 | 144.00 | -23.04 | 2 17 | 2777 2797 | 15 |
|                        | 86.67% | 93.33% |      |           |    |

Forward: Score: 134.000000 Q:2 to 20 R:682 to 703 Align Len (19)  
(57.89%) (78.95%)

Query: 3' ggCCGUUCAGUAG-GAACCGAu 5'

| :|| ::|| |||||:|  
Ref: 5' ttGATAATCTGTCTCTTGGTTg 3'

Energy: -15.870000 kCal/Mol

Scores for this hit:

|                        |        |        |      |         |    |
|------------------------|--------|--------|------|---------|----|
| >ssp-miR169 HQ342888.1 | 134.00 | -15.87 | 2 20 | 682 703 | 19 |
|                        | 57.89% | 78.95% |      |         |    |

Forward: Score: 133.000000 Q:4 to 19 R:1118 to 1139 Align Len (16)  
(87.50%) (87.50%)

Query: 3' ggcCGUUCA-GUAGGAACCGau 5'

| |||| |||||  
Ref: 5' agtGGAAGTCCATCCTTGGagc 3'

Energy: -24.969999 kCal/Mol

Scores for this hit:

|                        |        |        |      |           |    |
|------------------------|--------|--------|------|-----------|----|
| >ssp-miR169 HQ342888.1 | 133.00 | -24.97 | 4 19 | 1118 1139 | 16 |
|                        | 87.50% | 87.50% |      |           |    |

Score for this Scan:

Seq1,Seq2,Tot Score,Tot Energy,Max Score,Max

Energy,Strand,Len1,Len2,Positions

|              |            |        |               |        |        |
|--------------|------------|--------|---------------|--------|--------|
| >>ssp-miR169 | HQ342888.1 | 411.00 | -63.88        | 144.00 | -24.97 |
| 18           | 21         | 5837   | 2777 682 1118 |        |        |

Complete

Read Sequence:ssp-miR437a (21 nt)

Read Sequence:HQ342888.1 Sugarcane yellow leaf virus isolate CHN-HN1,  
complete genome  
(5837 nt)

Performing Scan: ssp-miR437a vs HQ342888.1

Score for this Scan:

No Hits Found above Threshold

Complete

Read Sequence:ssp-miR437b (21 nt)

Read Sequence:HQ342888.1 Sugarcane yellow leaf virus isolate CHN-HN1,  
complete genome  
(5837 nt)

Performing Scan: ssp-miR437b vs HQ342888.1

Score for this Scan:  
No Hits Found above Threshold  
Complete

Read Sequence:ssp-miR437c (21 nt)

Read Sequence:HQ342888.1 Sugarcane yellow leaf virus isolate CHN-HN1,  
complete genome  
(5837 nt)

Performing Scan: ssp-miR437c vs HQ342888.1

Score for this Scan:  
No Hits Found above Threshold  
Complete

Read Sequence:ssp-miR528 (21 nt)

Read Sequence:HQ342888.1 Sugarcane yellow leaf virus isolate CHN-HN1,  
complete genome  
(5837 nt)

Performing Scan: ssp-miR528 vs HQ342888.1

Forward: Score: 141.000000 Q:2 to 18 R:4162 to 4182 Align Len (16)  
(75.00%) (93.75%)

Query: 3' gaggAGACGUACGGGGAAGGu 5'

|:||| |||||:|||||

Ref: 5' ccgaTTTGAATGCCTTTTCCa 3'

Energy: -22.930000 kCal/Mol

Scores for this hit:

|                        |        |        |      |           |    |
|------------------------|--------|--------|------|-----------|----|
| >ssp-miR528 HQ342888.1 | 141.00 | -22.93 | 2 18 | 4162 4182 | 16 |
|                        | 75.00% | 93.75% |      |           |    |

Forward: Score: 133.000000 Q:2 to 19 R:5368 to 5389 Align Len (18)  
(61.11%) (77.78%)

Query: 3' gagGAGA-CGUACGGGGAAGGu 5'

:||| || :|:|||||

Ref: 5' gggTTCTCGCCCCTCTCTTCCg 3'

Energy: -21.860001 kCal/Mol

Scores for this hit:

|                        |        |        |      |           |    |
|------------------------|--------|--------|------|-----------|----|
| >ssp-miR528 HQ342888.1 | 133.00 | -21.86 | 2 19 | 5368 5389 | 18 |
|                        | 61.11% | 77.78% |      |           |    |

Forward: Score: 131.000000 Q:3 to 20 R:4048 to 4068 Align Len (17)  
(58.82%) (76.47%)

Query: 3' gaGGAGACGUACGGGGAAGgu 5'  
          :| |: | : |||||

Ref: 5' agTCTTCCCGGCCCTTCat 3'

Energy: -20.020000 kCal/Mol

Scores for this hit:

|                        |        |        |   |    |      |      |    |
|------------------------|--------|--------|---|----|------|------|----|
| >ssp-miR528 HQ342888.1 | 131.00 | -20.02 | 3 | 20 | 4048 | 4068 | 17 |
|                        | 58.82% | 76.47% |   |    |      |      |    |

Forward: Score: 130.000000 Q:2 to 19 R:4436 to 4456 Align Len (17)  
(64.71%) (82.35%)

Query: 3' gagGAGACGUACGGGGAAGGu 5'  
          | || |:| |:|:||||

Ref: 5' ataCCCTTCGTCCTCTTTCCa 3'

Energy: -21.270000 kCal/Mol

Scores for this hit:

|                        |        |        |   |    |      |      |    |
|------------------------|--------|--------|---|----|------|------|----|
| >ssp-miR528 HQ342888.1 | 130.00 | -21.27 | 2 | 19 | 4436 | 4456 | 17 |
|                        | 64.71% | 82.35% |   |    |      |      |    |

Score for this Scan:

Seq1,Seq2,Tot Score,Tot Energy,Max Score,Max  
Energy,Strand,Len1,Len2,Positions

|              |            |        |        |        |           |
|--------------|------------|--------|--------|--------|-----------|
| >>ssp-miR528 | HQ342888.1 | 535.00 | -86.08 | 141.00 | -22.93    |
| 22           | 21         | 5837   | 4162   | 5368   | 4048 4436 |

Complete

Read Sequence:ssp-miR827 (21 nt)

Read Sequence:HQ342888.1 Sugarcane yellow leaf virus isolate CHN-HN1,  
complete genome  
(5837 nt)

=====

Performing Scan: ssp-miR827 vs HQ342888.1

=====

Score for this Scan:

No Hits Found above Threshold

Complete

Read Sequence:ssp-miR444a (21 nt)

Read Sequence:HQ342888.1 Sugarcane yellow leaf virus isolate CHN-HN1,  
complete genome  
(5837 nt)

=====

Performing Scan: ssp-miR444a vs HQ342888.1

=====

Forward: Score: 130.000000 Q:2 to 11 R:4381 to 4401 Align Len (9)  
(77.78%) (100.00%)

Query: 3' uucgaacuccgUUGUUGACGu 5'  
          |:|||||:

Ref: 5' gtggagcattgAGCAACTGTc 3'

Energy: -16.370001 kCal/Mol

Scores for this hit:

|              |            |        |        |   |    |      |      |   |
|--------------|------------|--------|--------|---|----|------|------|---|
| >ssp-miR444a | HQ342888.1 | 130.00 | -16.37 | 2 | 11 | 4381 | 4401 | 9 |
| 77.78%       | 100.00%    |        |        |   |    |      |      |   |

Score for this Scan:

Seq1,Seq2,Tot Score,Tot Energy,Max Score,Max

Energy,Strand,Len1,Len2,Positions

|               |            |        |        |        |        |
|---------------|------------|--------|--------|--------|--------|
| >>ssp-miR444a | HQ342888.1 | 130.00 | -16.37 | 130.00 | -16.37 |
| 24            | 21         | 5837   | 4381   |        |        |

Complete

Read Sequence:ssp-miR444b (21 nt)

Read Sequence:HQ342888.1 Sugarcane yellow leaf virus isolate CHN-HN1,  
complete genome  
(5837 nt)

=====

Performing Scan: ssp-miR444b vs HQ342888.1

=====

Forward: Score: 130.000000 Q:2 to 11 R:4381 to 4401 Align Len (9)  
(77.78%) (100.00%)

Query: 3' uucgaacuccgUUGUUGACGu 5'

|:|||||:

Ref: 5' gtggagcattgAGCAACTGTc 3'

Energy: -16.370001 kCal/Mol

Scores for this hit:

|              |            |        |        |   |    |      |      |   |
|--------------|------------|--------|--------|---|----|------|------|---|
| >ssp-miR444b | HQ342888.1 | 130.00 | -16.37 | 2 | 11 | 4381 | 4401 | 9 |
| 77.78%       | 100.00%    |        |        |   |    |      |      |   |

Score for this Scan:

Seq1,Seq2,Tot Score,Tot Energy,Max Score,Max

Energy,Strand,Len1,Len2,Positions

|               |            |        |        |        |        |
|---------------|------------|--------|--------|--------|--------|
| >>ssp-miR444b | HQ342888.1 | 130.00 | -16.37 | 130.00 | -16.37 |
| 25            | 21         | 5837   | 4381   |        |        |

Complete

Read Sequence:ssp-miR444c-3p (21 nt)

Read Sequence:HQ342888.1 Sugarcane yellow leaf virus isolate CHN-HN1,  
complete genome  
(5837 nt)

=====

Performing Scan: ssp-miR444c-3p vs HQ342888.1

=====

Forward: Score: 131.000000 Q:2 to 18 R:4378 to 4401 Align Len (19)  
(63.16%) (78.95%)

Query: 3' uucgAACUC-UG--UUGUUGACGu 5'

| ||| |: |:|||||:

Ref: 5' atcgTGGAGCATTGAGCAACTGTc 3'

Energy: -16.370001 kCal/Mol

Scores for this hit:

|                 |            |        |        |   |    |      |      |    |
|-----------------|------------|--------|--------|---|----|------|------|----|
| >ssp-miR444c-3p | HQ342888.1 | 131.00 | -16.37 | 2 | 18 | 4378 | 4401 | 19 |
|                 | 63.16%     | 78.95% |        |   |    |      |      |    |

Score for this Scan:

Seq1,Seq2,Tot Score,Tot Energy,Max Score,Max  
Energy,Strand,Len1,Len2,Positions

|                  |            |        |        |        |        |
|------------------|------------|--------|--------|--------|--------|
| >>ssp-miR444c-3p | HQ342888.1 | 131.00 | -16.37 | 131.00 | -16.37 |
|                  | 26         | 21     | 5837   | 4378   |        |

Complete

Read Sequence:ssp-miR1128 (21 nt)

Read Sequence:HQ342888.1 Sugarcane yellow leaf virus isolate CHN-HN1,  
complete genome  
(5837 nt)

=====

Performing Scan: ssp-miR1128 vs HQ342888.1

=====

Score for this Scan:

No Hits Found above Threshold

Complete

Read Sequence:ssp-miR1432 (21 nt)

Read Sequence:HQ342888.1 Sugarcane yellow leaf virus isolate CHN-HN1,  
complete genome  
(5837 nt)

=====

Performing Scan: ssp-miR1432 vs HQ342888.1

=====

Forward: Score: 134.000000 Q:2 to 20 R:4627 to 4648 Align Len (19)  
(63.16%) (73.68%)

Query: 3' caGCCACAG-UAGAAAGGACUc 5'

||| || | : |||||:

Ref: 5' atCGGACTCTAATGTTTCCTGGt 3'

Energy: -16.570000 kCal/Mol

Scores for this hit:

|              |            |        |        |   |    |      |      |    |
|--------------|------------|--------|--------|---|----|------|------|----|
| >ssp-miR1432 | HQ342888.1 | 134.00 | -16.57 | 2 | 20 | 4627 | 4648 | 19 |
|              | 63.16%     | 73.68% |        |   |    |      |      |    |

Score for this Scan:

Seq1,Seq2,Tot Score,Tot Energy,Max Score,Max  
Energy,Strand,Len1,Len2,Positions

|               |            |        |        |        |        |
|---------------|------------|--------|--------|--------|--------|
| >>ssp-miR1432 | HQ342888.1 | 134.00 | -16.57 | 134.00 | -16.57 |
|               | 28         | 21     | 5837   | 4627   |        |

Complete

Scan Complete

## RNA22. Algorithm results

ssp\_miR528 HQ342888.1 Sugarcane yellow leaf virus, CHN\_HN1 target from/to=[252,272]  
-13.00 GTCACATGGTGCCTATTCTG TGGAAGGGGCATGCAGAGGAG .(((.(((((((.(((  
.)))))))))).)). 16 21 0.045600

ssp\_miR528 HQ342888.1 Sugarcane yellow leaf virus, CHN\_HN1 target from/to=[262,281]  
-16.90 TGCCTATTCTGCTCCTGCCA TGGAAGGGGCATGCAGAGGAG ..(((....(((((((  
)))..))))))....)). 13 20 0.045600

sof\_miR168a HQ342888.1 Sugarcane yellow leaf virus, CHN\_HN1 target from/to=[1045,1069]  
-12.90 ATCCCTCTAACGGAATTCCAAGTGC TCGCTTGGTGCAGATCGGGAC  
..(((.....(....(((((((. .))))))..).....))). 12 25 0.231000

sof\_miR159a HQ342888.1 Sugarcane yellow leaf virus, CHN\_HN1 target from/to=[1142,1163]  
-14.90 AAGCAGCCCATTTCACTCCAGT TTTGGATTGAAGGGAGCTCTG .(((.(((.(((.(((  
.))))..)))))). 17 22 0.040800

sof\_miR159b HQ342888.1 Sugarcane yellow leaf virus, CHN\_HN1 target from/to=[1142,1163]  
-14.90 AAGCAGCCCATTTCACTCCAGT TTTGGATTGAAGGGAGCTCTG .(((.(((.(((.(((  
.))))..)))))). 17 22 0.040800

sof\_miR159c HQ342888.1 Sugarcane yellow leaf virus, CHN\_HN1 target from/to=[1120,1143]  
-12.50 TGGAAGTCCATCCTTGAGCCAAA CTTGGATTGAAGGGAGCTCCT  
..(((.(((.(((.(((.(((. .))))..).....))). 16 24 0.040800

sof\_miR159c HQ342888.1 Sugarcane yellow leaf virus, CHN\_HN1 target from/to=[1143,1163]  
-15.20 AGCAGCCCATTTCACTCCAGT CTTGGATTGAAGGGAGCTCCT ((.(((.(((.(((.(((  
.))))..)))))). 17 21 0.040800

sof\_miR159d HQ342888.1 Sugarcane yellow leaf virus, CHN\_HN1 target from/to=[1142,1163]  
-14.90 AAGCAGCCCATTTCACTCCAGT TTTGGATTGAAGGGAGCTCTG .(((.(((.(((.(((  
.))))..)))))). 17 22 0.040800

sof\_miR159e HQ342888.1 Sugarcane yellow leaf virus, CHN\_HN1 target from/to=[1142,1163]  
-16.10 AAGCAGCCCATTTCACTCCAGT TTTGGATTGAAGGGAGCTCTT (((.(((.(((.(((  
.))))..)))))). 18 22 0.040800

ssp\_miR528 HQ342888.1 Sugarcane yellow leaf virus, CHN\_HN1 target from/to=[1137,1156]  
-15.20 AGCCAAAGCAGCCCATTTCA TGGAAGGGGCATGCAGAGGAG ..(((.(((.(((.(((  
))))..).....))). 14 20 0.040800

sof\_miR167a HQ342888.1 Sugarcane yellow leaf virus, CHN\_HN1 target from/to=[1646,1665]  
-13.00 AAGAGCAGACTCCAGCTTCG TGAAGCTGCCAGCATGATCTG .(((.(((.(((.(((  
))))..).....))). 15 20 0.066600

sof\_miR167b HQ342888.1 Sugarcane yellow leaf virus, CHN\_HN1 target from/to=[1646,1665]  
 -13.00 AAGAGCAGACTCCAGCTTCG TGAAGCTGCCAGCATGATCTG .(((.(.(.(((((((  
 )))))))).)).)).)). 15 20 0.066600

ssp\_miR444a HQ342888.1 Sugarcane yellow leaf virus, CHN\_HN1 target from/to=[1850,1871]  
 -17.60 GGGTGGAGGAGAACTGCTGCG TGCAGTTGTTGCCTCAAGCTT (((.(((...(((.(((((  
 )))))))).)).)).)). 17 22 0.011500

ssp\_miR444b HQ342888.1 Sugarcane yellow leaf virus, CHN\_HN1 target from/to=[1850,1871]  
 -17.60 GGGTGGAGGAGAACTGCTGCG TGCAGTTGTTGCCTCAAGCTT (((.(((...(((.(((((  
 )))))))).)).)).)). 17 22 0.011500

ssp\_miR444c\_3p HQ342888.1 Sugarcane yellow leaf virus, CHN\_HN1 target  
 from/to=[1850,1871] -16.00 GGGTGGAGGAGAACTGCTGCG TGCAGTTGTTGTCTCAAGCTT  
 (((...(((((((.(((((((.)))))).)).)).)).)) 17 22 0.011500

ssp\_miR444c\_3p HQ342888.1 Sugarcane yellow leaf virus, CHN\_HN1 target  
 from/to=[1874,1895] -13.30 AGGCCAGAACAAACAGCAGCA TGCAGTTGTTGTCTCAAGCTT  
 (((...(((.(((((((.(((((((.)))))).)).)).)).))...)) 16 22 0.011500

sof\_miR168b HQ342888.1 Sugarcane yellow leaf virus, CHN\_HN1 target from/to=[2145,2163]  
 -16.50 AGTCTGAGACTCCAAGCGG TCGCTTGGGCAGATCGGGAC ..((((...(((((((  
 ))))))))....)))).. 14 19 0.347000

sof\_miR159a HQ342888.1 Sugarcane yellow leaf virus, CHN\_HN1 target from/to=[2288,2309]  
 -13.40 TGGCAGCCTCATCTGGTCCGAC TTTGGATTGAAGGGAGCTCTG .(((.(((((((.(((((((  
 .)))))))))).)).)).)). 17 22 0.005020

sof\_miR159b HQ342888.1 Sugarcane yellow leaf virus, CHN\_HN1 target from/to=[2288,2309]  
 -13.40 TGGCAGCCTCATCTGGTCCGAC TTTGGATTGAAGGGAGCTCTG .(((.(((((((.(((((((  
 .)))))))))).)).)).)). 17 22 0.005020

sof\_miR159c HQ342888.1 Sugarcane yellow leaf virus, CHN\_HN1 target from/to=[2288,2309]  
 -15.10 TGGCAGCCTCATCTGGTCCGAC CTTGGATTGAAGGGAGCTCCT .(((.(((((((.(((((((  
 .)))))))))).)).)).)). 17 22 0.005020

sof\_miR159d HQ342888.1 Sugarcane yellow leaf virus, CHN\_HN1 target from/to=[2288,2309]  
 -13.40 TGGCAGCCTCATCTGGTCCGAC TTTGGATTGAAGGGAGCTCTG .(((.(((((((.(((((((  
 .)))))))))).)).)).)). 17 22 0.005020

sof\_miR167a HQ342888.1 Sugarcane yellow leaf virus, CHN\_HN1 target from/to=[2279,2298]  
 -20.50 CAGCTCCTCTGGCAGCCTCA TGAAGCTGCCAGCATGATCTG (((.(((.(((((((.(((  
 ))).))))))....)).)) 16 20 0.005020

sof\_miR167b HQ342888.1 Sugarcane yellow leaf virus, CHN\_HN1 target from/to=[2279,2298]



-20.50 CAGCTCCTCTGGCAGCCTCA TGAAGCTGCCAGCATGATCTG (((.(((.(((((((.(((  
)))..))))))..))) 16 20 0.005020

ssp\_miR528 HQ342888.1 Sugarcane yellow leaf virus, CHN\_HN1 target from/to=[2282,2302]  
-25.60 CTCCTCTGGCAGCCTCATCTG TGAAGGGGCATGCAGAGGAG ((((((.(((((((.(((  
.)))..))))))..)))) 18 21 0.005020

sof\_miR159e HQ342888.1 Sugarcane yellow leaf virus, CHN\_HN1 target from/to=[2513,2536]  
-13.30 GAGAGAAGGATTGTGCGATCCGAT TTTGGATTGAAAGGAGCTCTT  
((((.....((...(((((((. .))))))..))....)))) 15 24 0.140000

ssp\_miR444a HQ342888.1 Sugarcane yellow leaf virus, CHN\_HN1 target from/to=[2507,2527]  
-12.00 ACTAGTGAGAGAAGGATTGTG TGCAGTTGTTGCCTCAAGCTT .....(((.(((.(((((((  
.)))))..))..)).... 12 21 0.140000

ssp\_miR444b HQ342888.1 Sugarcane yellow leaf virus, CHN\_HN1 target from/to=[2507,2527]  
-12.00 ACTAGTGAGAGAAGGATTGTG TGCAGTTGTTGCCTCAAGCTT .....(((.(((.(((((((  
.)))))..))..)).... 12 21 0.140000

ssp\_miR444c\_3p HQ342888.1 Sugarcane yellow leaf virus, CHN\_HN1 target  
from/to=[2507,2527] -16.00 ACTAGTGAGAGAAGGATTGTG TGCAGTTGTTGTCTCAAGCTT  
.....(((.(((.(((((((. .))))))..)).... 13 21 0.140000

ssp\_miR528 HQ342888.1 Sugarcane yellow leaf virus, CHN\_HN1 target from/to=[2738,2757]  
-12.70 ATTCATTGAATCCCTGTCCA TGAAGGGGCATGCAGAGGAG .(((.(((.(((((((.((((  
)))..))))..))..)).. 16 20 0.177000

ssp\_miR169 HQ342888.1 Sugarcane yellow leaf virus, CHN\_HN1 target from/to=[2775,2797]  
-23.50 CCAGCAGAAGTCATTCATGGCTG TAGCCAAGGATGACTTGCCGG ((.(((.(((((((.(((((((  
))))..))))..))))..)) 19 23 0.114000

ssp\_miR444c\_3p HQ342888.1 Sugarcane yellow leaf virus, CHN\_HN1 target  
from/to=[2792,2813] -13.30 TGGCTGGAGGGACAAGATCGTA TGCAGTTGTTGTCTCAAGCTT  
.(((.....(((((((.(((((((.))))..))))..)))).. 17 22 0.114000

sof\_miR168b HQ342888.1 Sugarcane yellow leaf virus, CHN\_HN1 target from/to=[3581,3598]  
-13.10 GTGCACACATCCGAGCGA TCGCTTGGGCAGATCGGGAC ((.(((.(((((((.(((((((  
))))..))))..))))..)) 12 18 0.064700

ssp\_miR528 HQ342888.1 Sugarcane yellow leaf virus, CHN\_HN1 target from/to=[4162,4182]  
-19.60 CCGATTTGAATGCCTTTTCCA TGAAGGGGCATGCAGAGGAG .....(((.(((((((.(((((((  
))))..))))..)))).. 16 21 0.020000

ssp\_miR528 HQ342888.1 Sugarcane yellow leaf virus, CHN\_HN1 target from/to=[4437,4456]  
-15.90 TACCCTTCGTCTCTTTCCA TGAAGGGGCATGCAGAGGAG ..(((.(((.(((((((.(((((((

)))))))))).))).. 16 20 0.238000  
 ssp\_miR444c\_3p HQ342888.1 Sugarcane yellow leaf virus, CHN\_HN1 target  
 from/to=[4890,4912] -14.90 CAAAATGGGATAAGACTACTGCATGCAGTTGTTGTCTCAAGCTT  
 ....((((((..(((.(((( ( )))))))))))..... 15 23 0.192000  
 sof\_miR168a HQ342888.1 Sugarcane yellow leaf virus, CHN\_HN1 target from/to=[5087,5107]  
 -13.50 GACCCGAAGGTGCTCAACTGG TCGCTTGGTGCAGATCGGGAC ..((((((..(((.((((  
 )))..)))..))..))).. 13 21 0.343000  
 sof\_miR168b HQ342888.1 Sugarcane yellow leaf virus, CHN\_HN1 target from/to=[5087,5107]  
 -16.40 GACCCGAAGGTGCTCAACTGG TCGCTTGGGCAGATCGGGAC ..((((((..(((((((  
 )))..))))))..))).. 15 21 0.343000  
 ssp\_miR528 HQ342888.1 Sugarcane yellow leaf virus, CHN\_HN1 target from/to=[5169,5189]  
 -18.30 CTCCTCCACCCCCCGTCTC TGAAGGGGCATGCAGAGGAG ((((((.....(((((((  
 .)))..))).....)))) 13 21 0.142000  
 ssp\_miR528 HQ342888.1 Sugarcane yellow leaf virus, CHN\_HN1 target from/to=[5691,5709]  
 -16.40 TTAAACTGAGCTCTTTCCA TGAAGGGGCATGCAGAGGAG .....(((((((((((  
 ))))))))..))).. 13 19 0.242000  
 sof\_miR396 HQ342888.1 Sugarcane yellow leaf virus, CHN\_HN1 target from/to=[5799,5821]  
 -12.00 AAGCCCAAGCTAAAGGGGTGGAA TTCCACAGCTTTCTTGAAGT .....(((((((((  
 ))))))..))))))..... 14 23 0.107000

psRNATarget Results of SCYLV-CHN-HN1 (HQ342888)

| miRNA_Acc.               | Target_Acc.  | Expectation | UPE\$ | miRNA_start | miRNA_end | Target_start | Target_end             | miRNA_aligned_fragment | Target_aligned_fragment | Inhibition                    |
|--------------------------|--------------|-------------|-------|-------------|-----------|--------------|------------------------|------------------------|-------------------------|-------------------------------|
| Target_Desc.             | Multiplicity |             |       |             |           |              |                        |                        |                         |                               |
| sof-miR159e HQ342888.1   | 6.5          | -1.0        | 1     | 21          | 1143      | 1163         | UUUGGAUUUGAAAGGAGCUCUU | AGCAGCCCAUUUCACUCCAGU  | Cleavage                | Sugarcane yellow leaf virus 1 |
| sof-miR167a HQ342888.1   | 6.5          | -1.0        | 1     | 21          | 2279      | 2298         | UGAAGCUGCCAGCAUGAUCUG  | CAGCUCCU-CUGGCAGCCUCA  | Cleavage                | Sugarcane yellow leaf virus 1 |
| sof-miR167b HQ342888.1   | 6.5          | -1.0        | 1     | 21          | 2279      | 2298         | UGAAGCUGCCAGCAUGAUCUG  | CAGCUCCU-CUGGCAGCCUCA  | Cleavage                | Sugarcane yellow leaf virus 1 |
| sof-miR396 HQ342888.1    | 6.5          | -1.0        | 1     | 21          | 1666      | 1686         | UUCCACAGCUUUUCUUGAACUG | ACUGUCGAGAAAGCUAUGGUU  | Cleavage                | Sugarcane yellow leaf virus 1 |
| sof-miR159a HQ342888.1   | 7.0          | -1.0        | 1     | 21          | 1143      | 1163         | UUUGGAUUUGAAGGGAGCUCUG | AGCAGCCCAUUUCACUCCAGU  | Cleavage                | Sugarcane yellow leaf virus 2 |
| sof-miR159a HQ342888.1   | 7.0          | -1.0        | 1     | 21          | 1123      | 1143         | UUUGGAUUUGAAGGGAGCUCUG | AAGUCCAUCCUUGGAGCCAAA  | Cleavage                | Sugarcane yellow leaf virus 2 |
| sof-miR159b HQ342888.1   | 7.0          | -1.0        | 1     | 21          | 1143      | 1163         | UUUGGAUUUGAAGGGAGCUCUG | AGCAGCCCAUUUCACUCCAGU  | Cleavage                | Sugarcane yellow leaf virus 2 |
| sof-miR159b HQ342888.1   | 7.0          | -1.0        | 1     | 21          | 1123      | 1143         | UUUGGAUUUGAAGGGAGCUCUG | AAGUCCAUCCUUGGAGCCAAA  | Cleavage                | Sugarcane yellow leaf virus 2 |
| sof-miR159c HQ342888.1   | 7.0          | -1.0        | 1     | 21          | 1143      | 1163         | CUUGGAUUUGAAGGGAGCUCCU | AGCAGCCCAUUUCACUCCAGU  | Cleavage                | Sugarcane yellow leaf virus 1 |
| sof-miR159d HQ342888.1   | 7.0          | -1.0        | 1     | 21          | 1143      | 1163         | UUUGGAUUUGAAGGGAGCUCUG | AGCAGCCCAUUUCACUCCAGU  | Cleavage                | Sugarcane yellow leaf virus 2 |
| sof-miR159d HQ342888.1   | 7.0          | -1.0        | 1     | 21          | 1123      | 1143         | UUUGGAUUUGAAGGGAGCUCUG | AAGUCCAUCCUUGGAGCCAAA  | Cleavage                | Sugarcane yellow leaf virus 2 |
| sof-miR168b HQ342888.1   | 7.0          | -1.0        | 1     | 20          | 5620      | 5639         | UCGCUUGGGCAGAUCCGGAC   | CUCCUUGUUUGGUUGAGUGU   | Cleavage                | Sugarcane yellow leaf virus 1 |
| sof-miR156 HQ342888.1    | 7.5          | -1.0        | 1     | 20          | 1188      | 1207         | UGACAGAAGAGAGUGAGCAC   | GUCUUUCUUAUUUUUGACA    | Translation             | Sugarcane yellow leaf virus 1 |
| ssp-miR444b.1 HQ342888.1 | 4.5          | -1.0        | 1     | 21          | 1664      | 1684         | CGACUGUCGAGAAAGCUAUGG  | UUGUGGCUUUCUUGCAAGUUG  | Cleavage                | Sugarcane yellow leaf virus 4 |
| ssp-miR528 HQ342888.1    | 5.0          | -1.0        | 1     | 21          | 4162      | 4182         | UGGAAGGGGCAUGCAGAGGAG  | CCGAUUUGAAUGCCUUUCCA   | Cleavage                | Sugarcane yellow leaf virus 4 |
| ssp-miR169 HQ342888.1    | 5.5          | -1.0        | 1     | 21          | 2777      | 2797         | UAGCCAAGGAUGACUUGCCGG  | AGCAGAAGUCAUUAUGGCUG   | Cleavage                | Sugarcane yellow leaf virus 1 |
| ssp-miR528 HQ342888.1    | 6.0          | -1.0        | 1     | 21          | 4436      | 4456         | UGGAAGGGGCAUGCAGAGGAG  | AUACCCUUCGUCCUCUUCCA   | Translation             | Sugarcane yellow leaf virus 4 |
| ssp-miR167b HQ342888.1   | 6.5          | -1.0        | 1     | 21          | 2279      | 2298         | UGAAGCUGCCAGCAUGAUCUG  | CAGCUCCU-CUGGCAGCCUCA  | Cleavage                | Sugarcane yellow leaf virus 1 |
| ssp-miR396 HQ342888.1    | 6.5          | -1.0        | 1     | 21          | 1666      | 1686         | UUCCACAGCUUUUCUUGAACUG | ACUGUCGAGAAAGCUAUGGUU  | Cleavage                | Sugarcane yellow leaf virus 1 |
| ssp-miR444b.1 HQ342888.1 | 6.5          | -1.0        | 1     | 21          | 2317      | 2337         | AAGAUUUAAGGAGGCUGUCA   | UUGUGGCUUUCUUGCAAGUUG  | Cleavage                | Sugarcane yellow leaf virus 4 |
| ssp-miR159a HQ342888.1   | 7.0          | -1.0        | 1     | 21          | 1143      | 1163         | UUUGGAUUUGAAGGGAGCUCUG | AGCAGCCCAUUUCACUCCAGU  | Cleavage                | Sugarcane yellow leaf virus 2 |
| ssp-miR159a HQ342888.1   | 7.0          | -1.0        | 1     | 21          | 1123      | 1143         | UUUGGAUUUGAAGGGAGCUCUG | AAGUCCAUCCUUGGAGCCAAA  | Cleavage                | Sugarcane yellow leaf virus 2 |
| ssp-miR528 HQ342888.1    | 7.0          | -1.0        | 1     | 21          | 262       | 281          | UGGAAGGGGCAUGCAGAGGAG  | UGCCUAUUC-UGCUCUGCCA   | Cleavage                | Sugarcane yellow leaf virus 4 |
| ssp-miR156 HQ342888.1    | 7.5          | -1.0        | 1     | 21          | 1187      | 1207         | UGACAGAAGAGAGUGAGCACA  | UGUCUUUCUUAUUUUUGACA   | Translation             | Sugarcane yellow leaf virus 1 |
| ssp-miR437a HQ342888.1   | 7.5          | -1.0        | 1     | 21          | 9         | 30           | AAAGU-UAGAGAAGUUUGACUU | CUUGUAAACUGCUCUAUGCUUU | Translation             | Sugarcane yellow leaf virus 1 |
| ssp-miR444a HQ342888.1   | 7.5          | -1.0        | 1     | 21          | 3732      | 3751         | UGCAGUUGGUUGCCUCAAGCUU | GUGUUGGAGGAAACG-CUGUG  | Translation             | Sugarcane yellow leaf virus 1 |
| ssp-miR444b.1 HQ342888.1 | 7.5          | -1.0        | 1     | 21          | 1621      | 1642         | UUGUGGCUUUCUU-         |                        |                         |                               |

|                       |                        |                             |                             |                       |
|-----------------------|------------------------|-----------------------------|-----------------------------|-----------------------|
| GCAAGUUG              | AAACCUGUUGAGAACGCUACAG | Cleavage                    | Sugarcane yellow leaf virus | 4                     |
| ssp-miR444b.1         | HQ342888.1             | 7.5 -1.0 1                  | 21 3082 3102                |                       |
| UUGUGGCUUUCUUGCAAGUUG | CAGAUUGGGCGAUAGCCAUGG  | Cleavage                    | Sugarcane yellow            |                       |
| leaf virus 4          |                        |                             |                             |                       |
| ssp-miR444b.2         | HQ342888.1             | 7.5 -1.0 1                  | 21 3732 3751                |                       |
| UGCAGUUGUUGCCUCAAGCUU | GUGUUGGAGGAAACG-CUGUG  | Translation                 | Sugarcane yellow            |                       |
| leaf virus 1          |                        |                             |                             |                       |
| ssp-miR528            | HQ342888.1             | 7.5 -1.0 1                  | 21 4702 4722                | UGGAAGGGGCAUGCAGAGGAG |
| AGAUUUUUCUUGUUCAUUUCA | Cleavage               | Sugarcane yellow leaf virus | 4                           |                       |
